# Supplementary material
Source: PubMed Central journal article supplement (PMC7228842)
Supplement: NIHMS1563702-supplement-Supporting_Info.pdf [file NIHMS1563702-supplement-Supporting_Info.pdf]

## Supporting Information

# Iron Magnetic Nanoparticle-Induced ROS Generation from Catechol-Containing Microgel for Environmental and Biomedical Applications

*Zhongtian Zhang<sup>1</sup>, Xin He<sup>2</sup>, Chao Zhou<sup>3</sup>, Max Raume<sup>1</sup>, Ming Wu<sup>2</sup>, Bo Liu<sup>\*,1</sup>, Bruce P. Lee<sup>\*,1</sup>*

<sup>1</sup> Department of Biomedical Engineering, Michigan Technological University, Houghton, 49931, USA

<sup>2</sup> School of Environmental Science and Engineering, Guangdong University of Technology, Guangzhou, 510006, China

<sup>3</sup> Institute of Biomedical Engineering and Health Sciences, Changzhou University, Changzhou, 213164, China

\* Corresponding authors

E-mails: Bruce P. Lee, [bplee@mtu.edu](mailto:bplee@mtu.edu)

Bo Liu, [lbb1107@126.com](mailto:lbb1107@126.com)

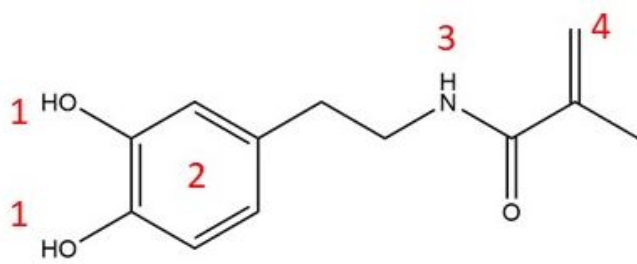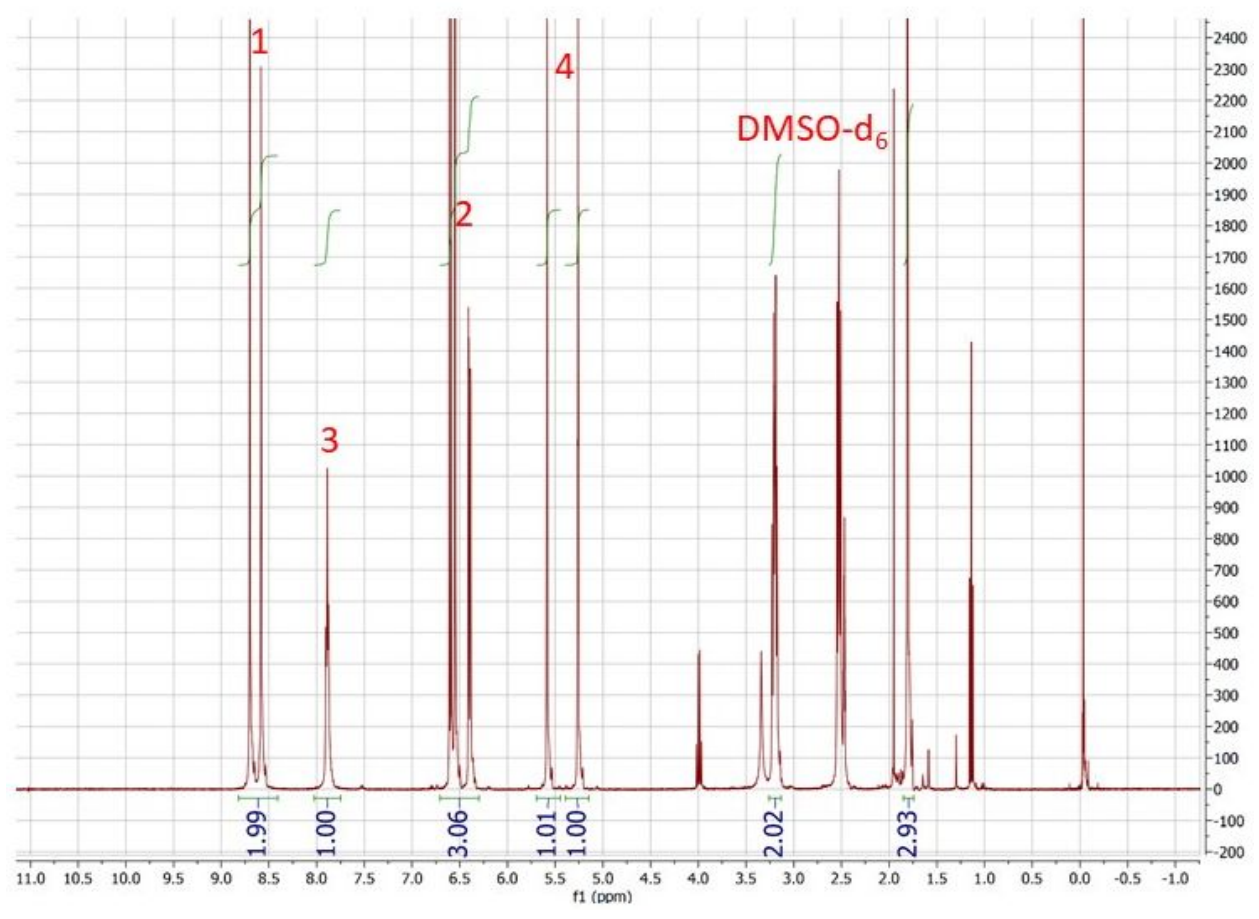

**Figure S1.** NMR spectrum of dopamine methacrylamide (DMA).

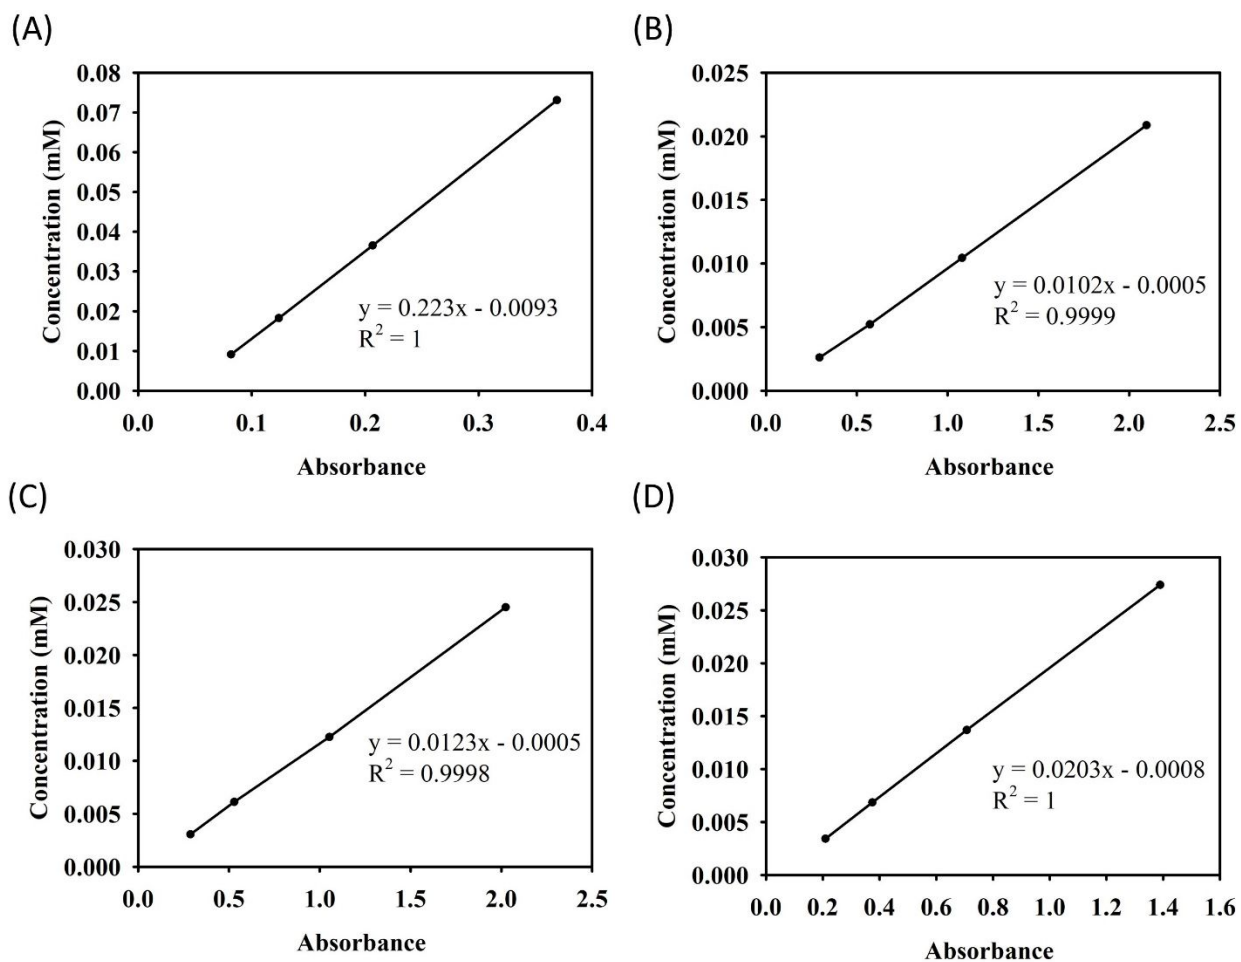

**Figure S2.** Concentration standard curve of (A) Alizarin Red S (peak at 422 nm), (B) Rhodamine B (peak at 536 nm), (C) Crystal Violet (peak at 591 nm), and (D) Malachite Green (peak at 617 nm) determined using UV-vis spectroscopy.

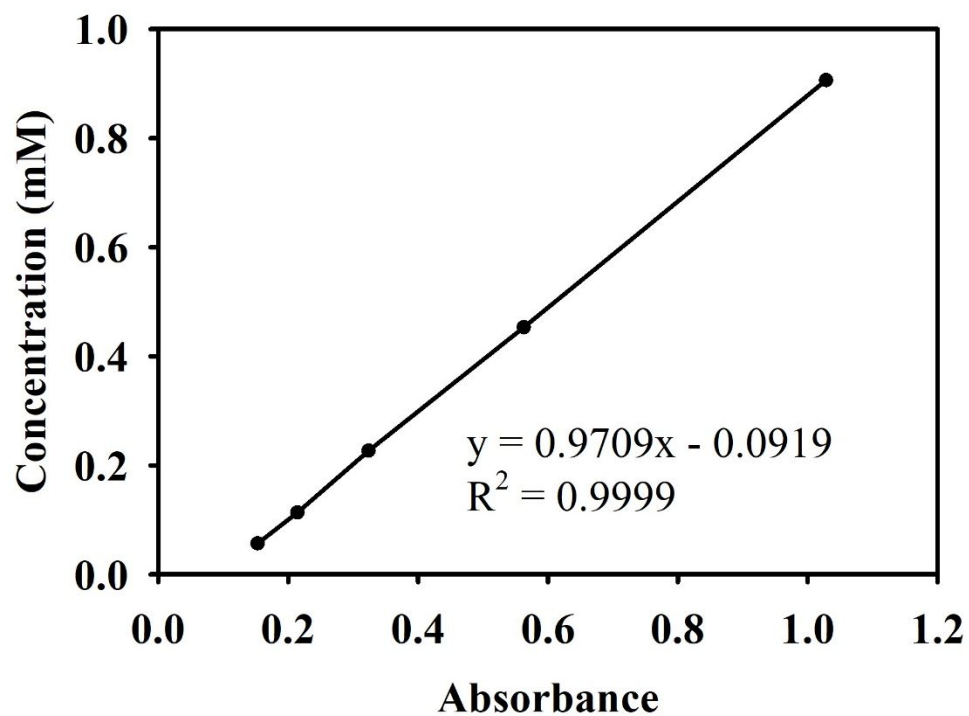

**Figure S3.** Concentration standard curve of ciprofloxacin determined using determined using UV-vis spectroscopy at a wavelength of 275 nm.

**Table S1.** Average particle sizes of microgels in dried and swollen states ( $n = 5$ ).

|         | DMA content in microgels   |                            |                            |
|---------|----------------------------|----------------------------|----------------------------|
|         | 0 mol%                     | 20 mol%                    | 40 mol%                    |
| Dried   | $53.7 \pm 3.2 \mu\text{m}$ | $23.9 \pm 2.5 \mu\text{m}$ | $27.3 \pm 4.7 \mu\text{m}$ |
| Swollen | $66.6 \pm 6.0 \mu\text{m}$ | $51.3 \pm 1.2 \mu\text{m}$ | $52.1 \pm 1.7 \mu\text{m}$ |

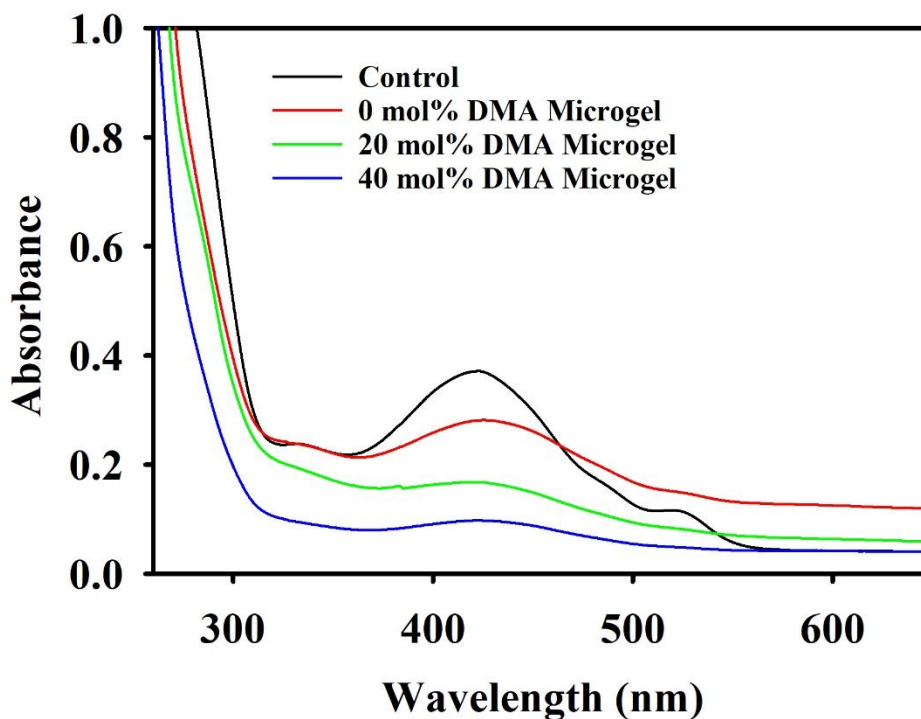

**Figure S4.** UV-vis spectra of Alizarin Red S (150 mg/mL) incubated with FeMNP (5 mg/mL) and microgel containing 0, 20, and 40 mol% of DMA (25 mg/mL) for 24 hours at 37 °C. Control is a mixture of Alizarin Red S and FeMNP incubated at the same concentration for 24 hours at 37 °C.

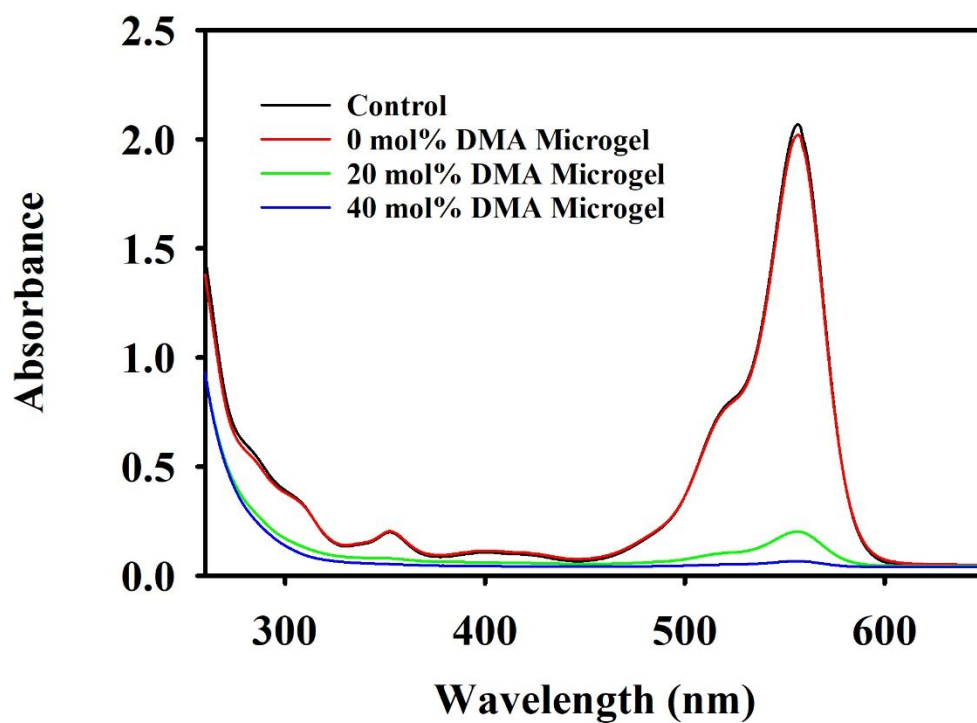

**Figure S5.** UV-vis spectra of Rhodamine B (150 mg/mL) incubated with FeMNP (5 mg/mL) and microgel containing 0, 20, and 40 mol% of DMA (25 mg/mL) for 24 hours at 37 °C. Control is a mixture of Rhodamine B and FeMNP incubated at the same concentration for 24 hours at 37 °C.

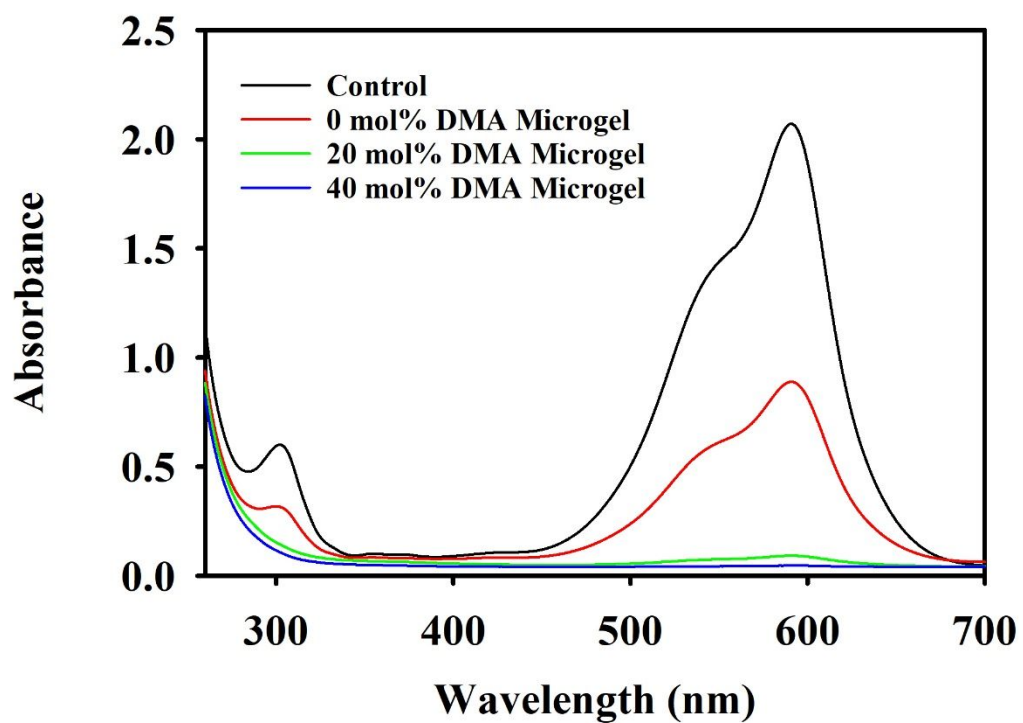

**Figure S6.** UV-vis spectra of Crystal Violet (150 mg/mL) incubated with FeMNP (5 mg/mL) and microgel containing 0, 20, and 40 mol% of DMA (25 mg/mL) for 24 hours at 37 °C. Control is a mixture of Crystal Violet and FeMNP incubated at the same concentration for 24 hours at 37 °C.

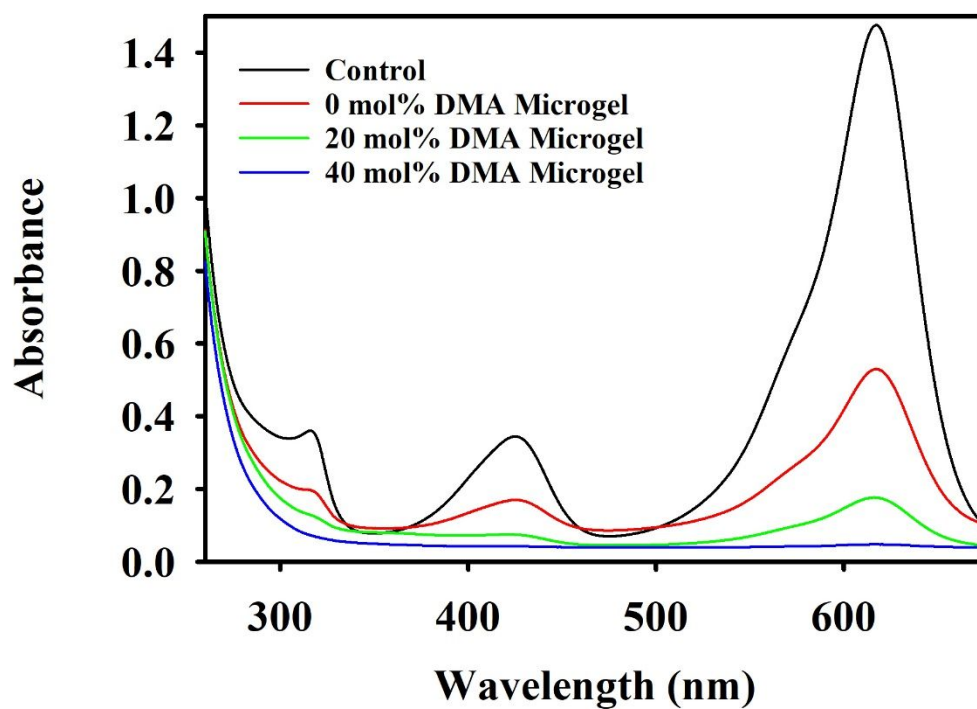

**Figure S7.** UV-vis spectra of Malachite Green (150 mg/mL) incubated with FeMNP (5 mg/mL) and microgel containing 0, 20, and 40 mol% of DMA (25 mg/mL) for 24 hours at 37 °C. Control is a mixture of Malachite Green and FeMNP incubated at the same concentration for 24 hours at 37 °C.



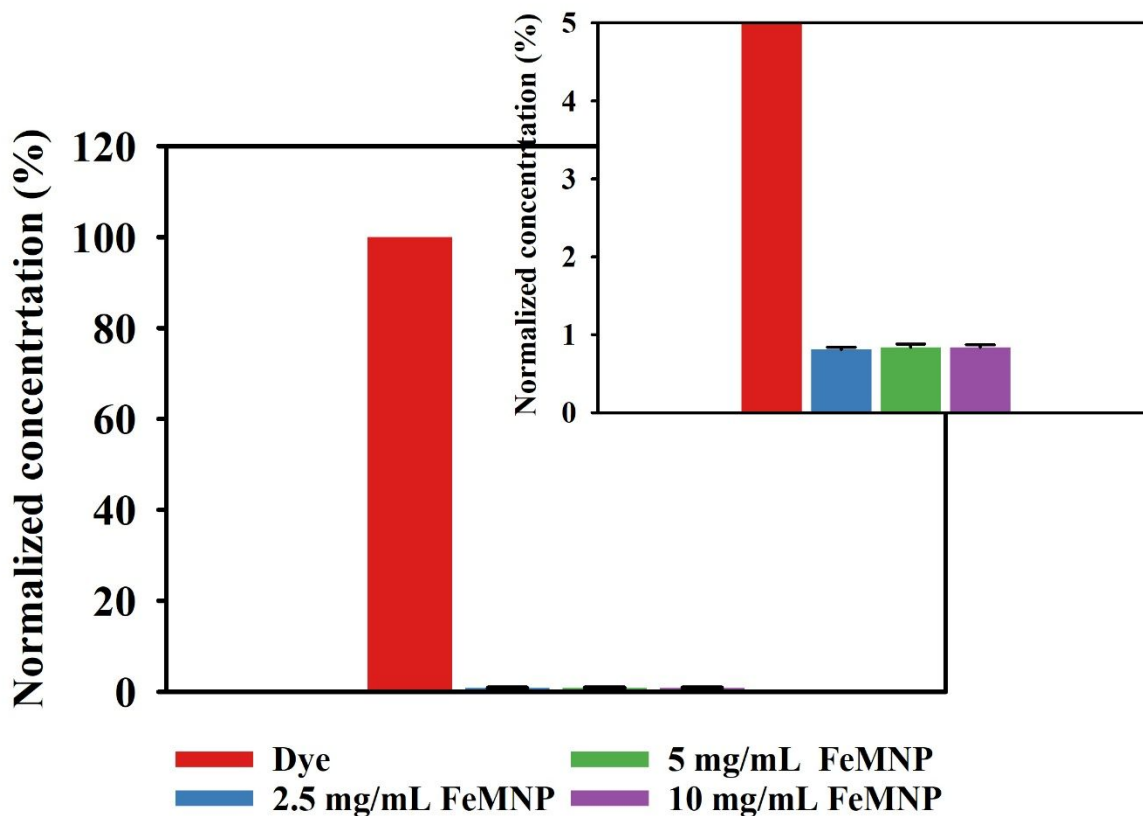

**Figure S8.** Normalized concentration of Rhodamine B after incubating with 40 mol% DMA microgels (25 mg/mL) and FeMNP (2.5-10 mg/mL) at pH 3 for 24 hours. The concentration was normalized to the starting dye concentration of 150 mg/mL. The inset shows the zoomed-in figure of normalized Rhodamine B dye concentration in the normalized concentration between 0-5 %. The dye has greater than 5%. The other groups show normalized concentration around 1 %.

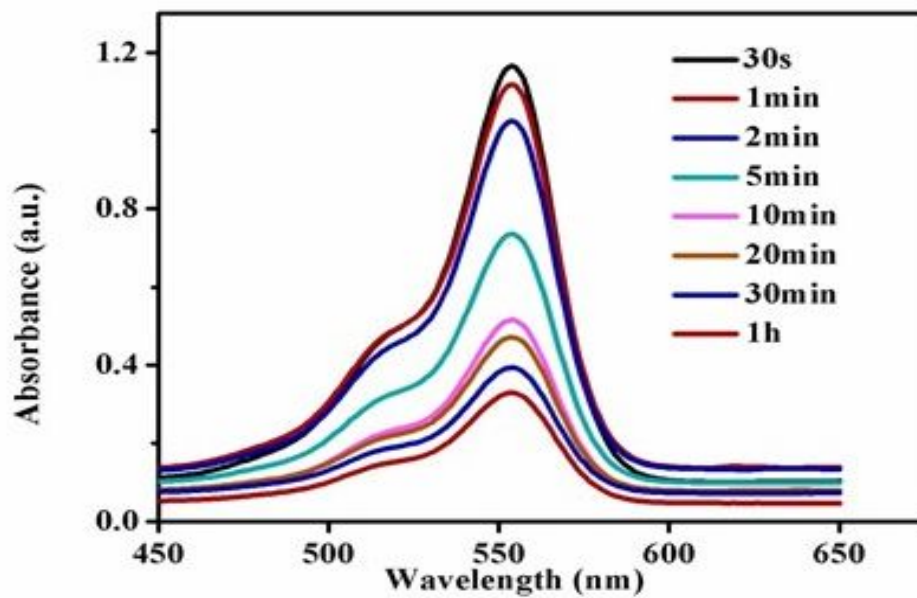

**Figure S9.** Changes in the UV-vis spectra of Rhodamine B (150 mg/mL) within 1 hour of mixing with FeMNP (5 mg/mL) and microgel containing 40 mol% DMA (25 mg/mL) at pH 3 and 37 °C.

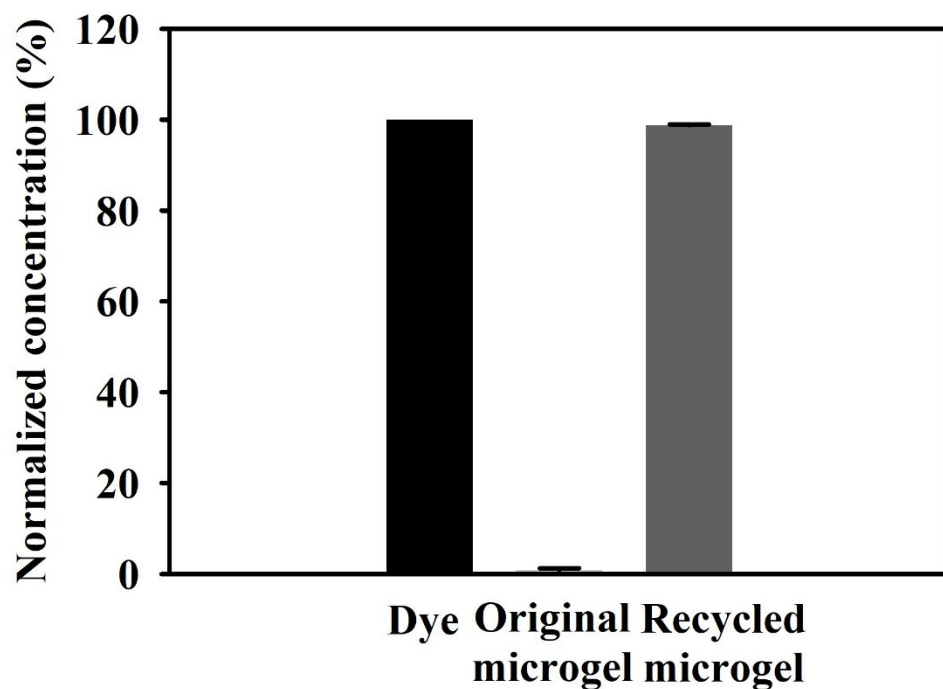

**Figure S10.** Normalized concentration of Rhodamine B after incubating with original and recycled 40 mol% DMA microgels (25 mg/mL) and FeMNP (5 mg/mL) at pH 3 for 24 hours. The original microgel is the as prepared microgel. The recycled microgel is recovered after a round of dye degradation. The microgel was collected by filtration and washed with pH 3 water and acetone.

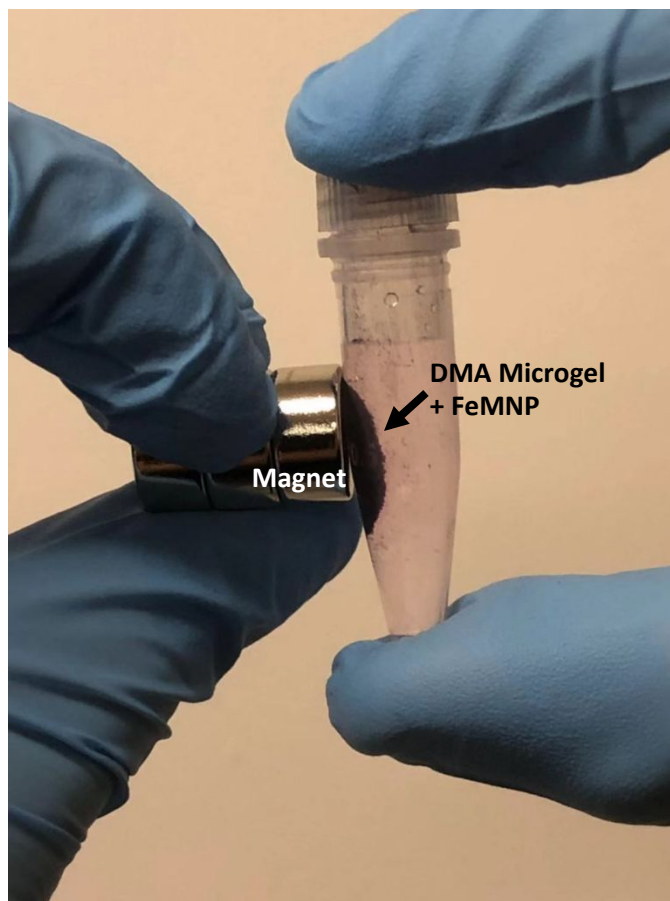

**Figure S11.** 40 mol% DMA microgels become magnetic after incubated with FeMNP (arrow) and accumulated to the magnet held by the hand on the left.

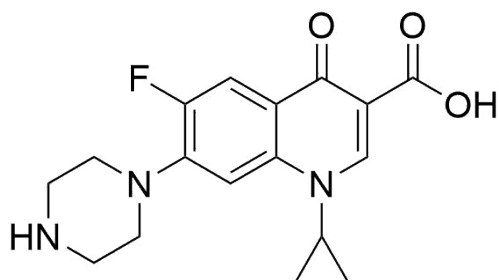

**Figure S12.** Chemical structure of ciprofloxacin.

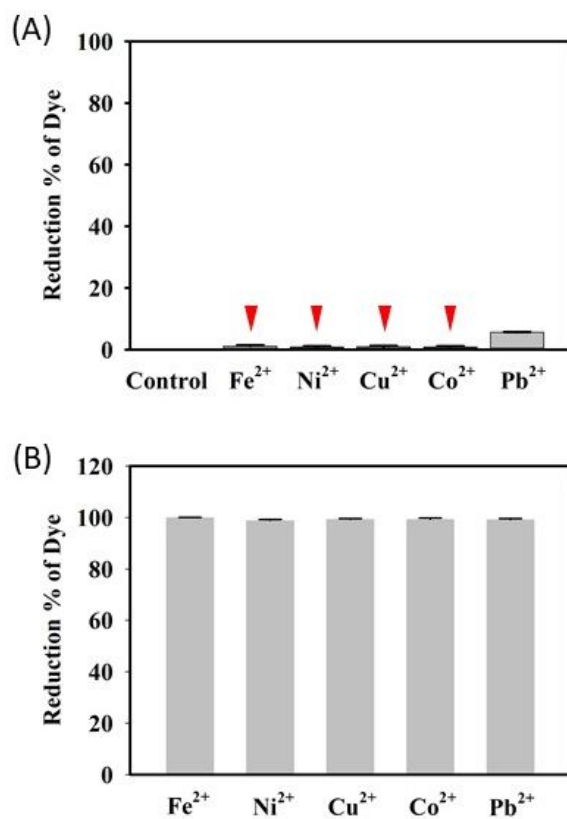

**Figure S13.** Percent reduction of Rhodamine B (150 mg/mL) after 24-hour incubation with (A) 20 mM of different metal ions and (B) a mixture of 40 mol% DMA microgel (25 mg/mL) and 20 mM of the different metal ions. The control in panel (A) is Rhodamine B (150 mg/mL) under the same incubation time and condition without any metal ions. The percent reduction of control is 0 %. Red triangles in panel (A) indicates trials with extremely low values.

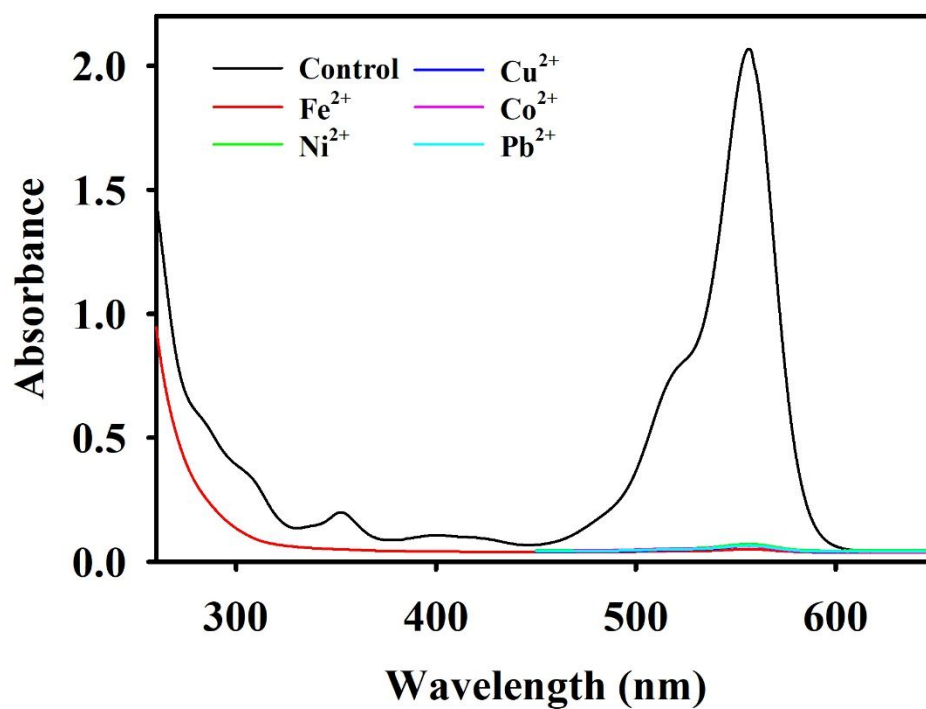

**Figure S14.** UV-vis spectra of Rhodamine B (150 mg/mL) after incubating with 40 mol% DMA microgel (25 mg/mL) and different metal ions ( $\text{Fe}^{2+}$ ,  $\text{Ni}^{2+}$ ,  $\text{Cu}^{2+}$ ,  $\text{Co}^{2+}$ ,  $\text{Pb}^{2+}$ , 20 mM) for 24 hours at pH 3 and 37 °C.

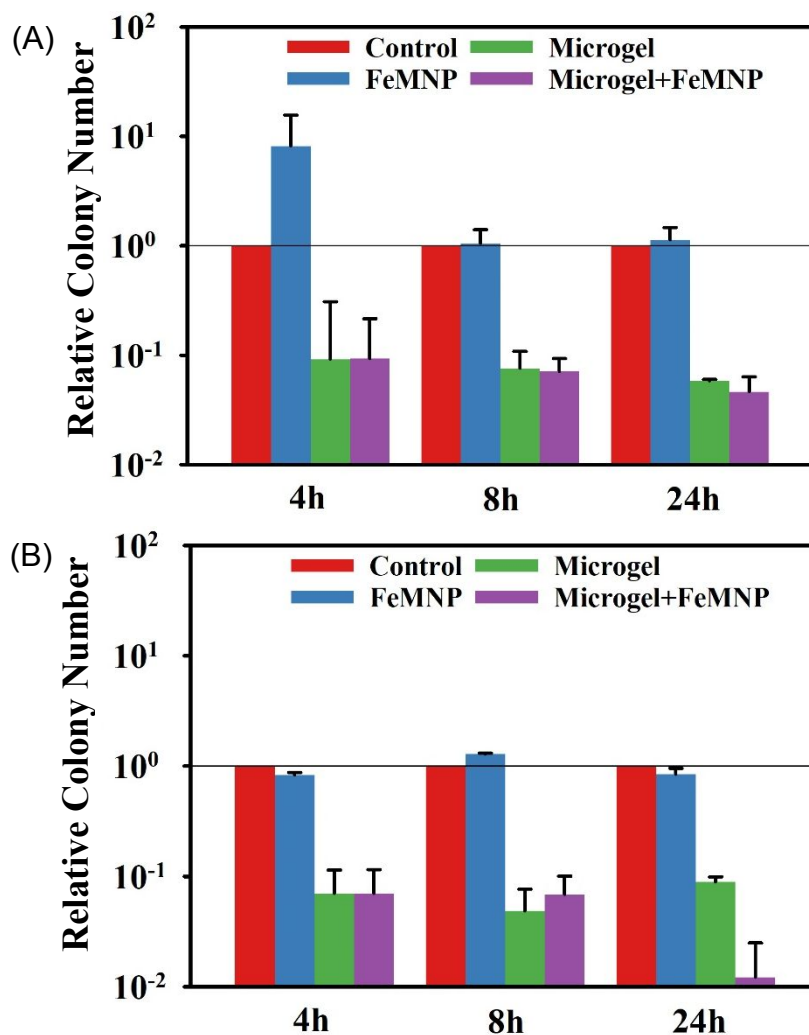

**Figure S15.** Relative colony number of (A) *S. aureus* and (B) *E. coli* after incubating with FeMNP (2 mg/mL), 40 mol% DMA microgel (10 mg/ mL), or the combination of the two for 4, 8, and 24 hours. The untreated control was the bacteria incubated in broth over the same periods.

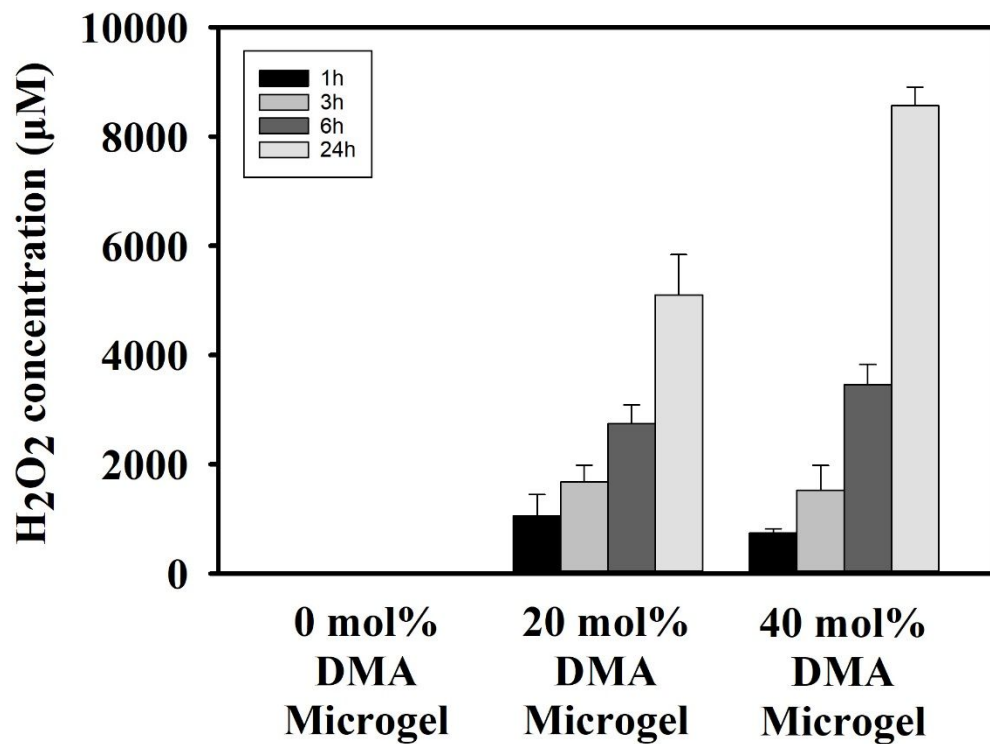

**Figure S16.** H<sub>2</sub>O<sub>2</sub> generated from the autoxidation of 0-40 mol% DMA microgels during 24-hour incubation at pH 7.4 and 37 °C.



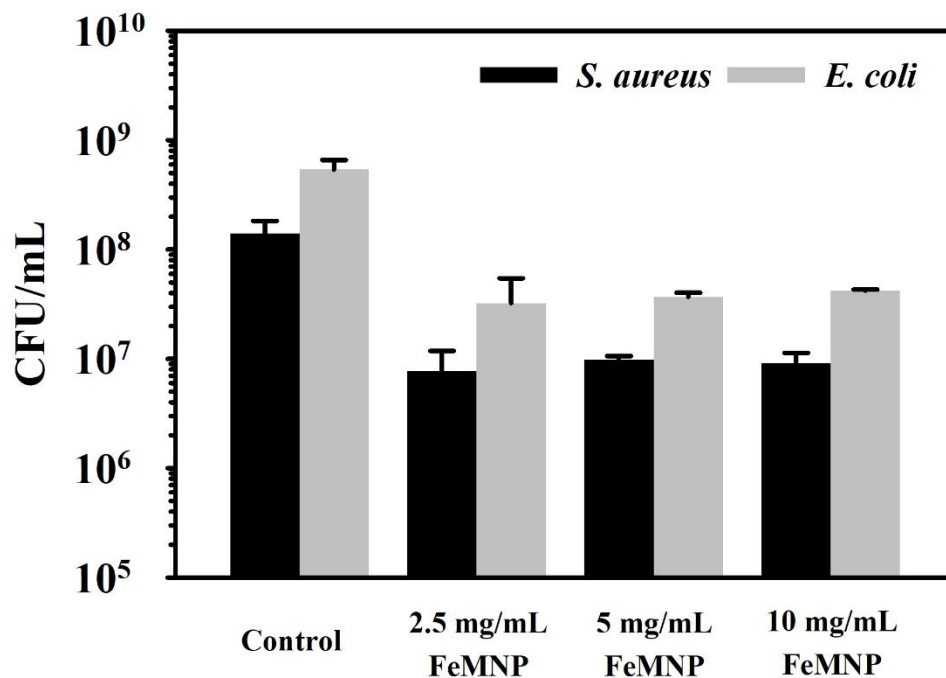

**Figure S17.** Bacteria concentration of *S. aureus* and *E. coli* after incubating with FeMNP (2.5-10 mg/mL) and 40 mol% DMA microgel (10 mg/ mL) for 24 hours. The untreated control was the bacteria incubated in broth over the same periods.

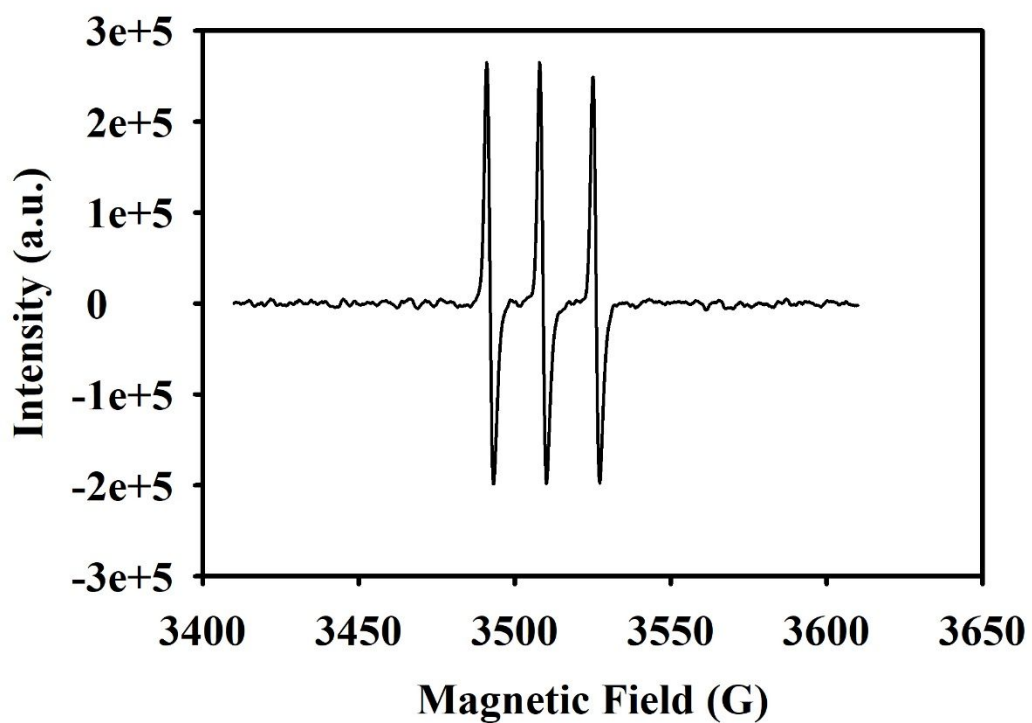

**Figure S18.** EPR spectra of potassium superoxide (0.25 g/mL) and FeMNP (5 mg/mL) for the detection of  $^1\text{O}_2$  in the presence of TEMP in DMSO anhydrous.

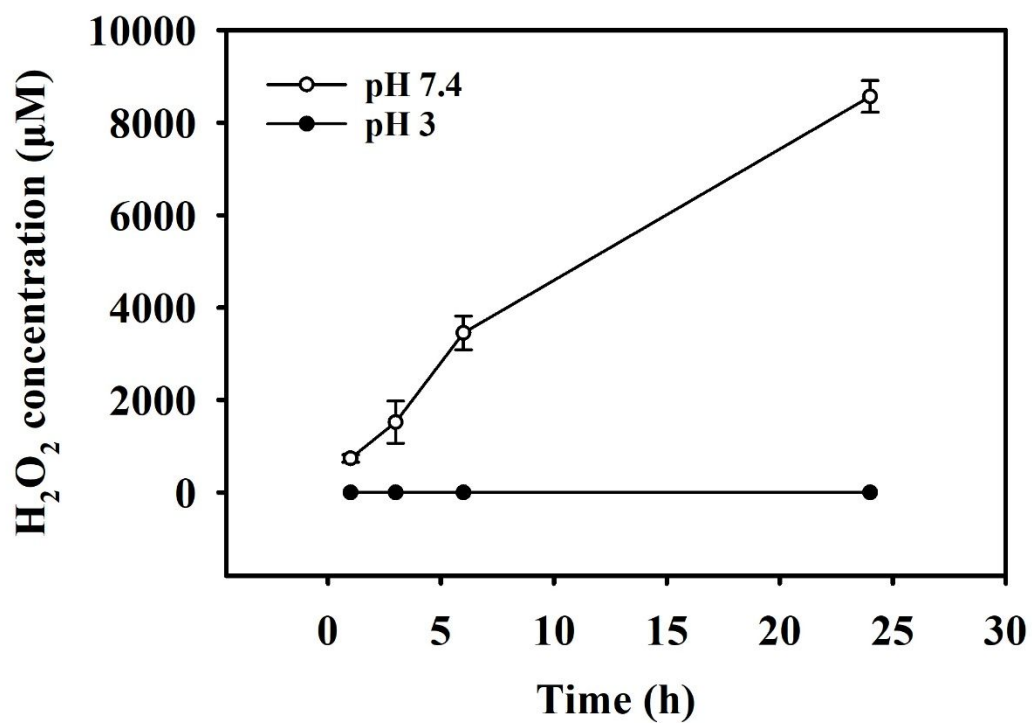

**Figure S19.** Hydrogen peroxide (H<sub>2</sub>O<sub>2</sub>) production of 40 mol% DMA microgel (34.5 mg/mL) after 24-hour incubation in pH = 3 & pH = 7.4 buffer at 37 °C.
